# Supplementary material for: The effect of group IIIA metal ion dopants on the photocatalytic activities of nanocrystalline Sr0.25H1.5Ta2O6·H2O
Source: Royal Society of Chemistry journal article supplement (doi:10.1039/c1cp22894c), 2011-12-02

Supplementary Information for

**Effects of group IIIA metal ion dopants on photocatalytic activities  
by nanocrystalline  $\text{Sr}_{0.25}\text{H}_{1.5}\text{Ta}_2\text{O}_6 \cdot \text{H}_2\text{O}$**

*Shijing Liang,<sup>a</sup> Shuying Zhu,<sup>a</sup> Jia Zhu,<sup>a</sup> Yan Chen,<sup>a</sup> Yongfan Zhang,<sup>a\*</sup> Ling Wu,<sup>a,b\*</sup>*

a: State Key Laboratory Breeding Base of Photocatalysis, Research Institute of Photocatalysis,

Fuzhou University, Fuzhou, Fujian 350002, China

b: State Key Laboratory of Structural Chemistry, Fujian Institute of Research on the Structure of

Matter, Chinese Academy of Sciences, Fuzhou, Fujian 350002, China

*Fax: +86-591-8373-9105; Tel: +86-591-8373-9362; E-mail: wuling@fzu.edu.cn;*

*zhangyf@fzu.edu.cn*

**Summary:** This file contains 2 pages, 3 Figures.

**Fig. S1** XRD patterns of Ga<sup>3+</sup> doped HST at different doping levels

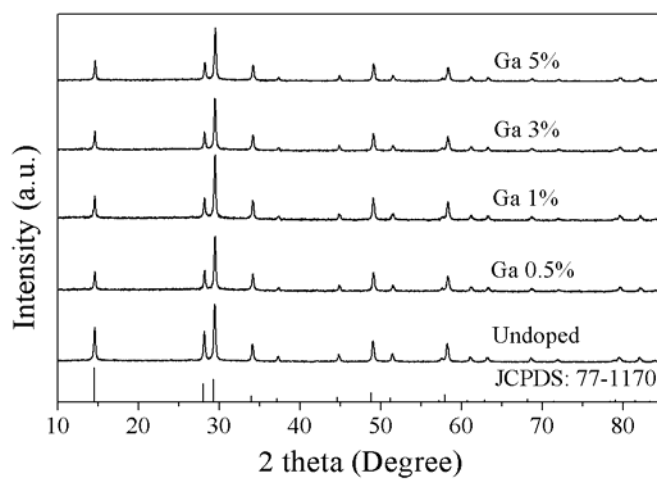

**Fig. S2** XRD peaks around 29.4° of Ga<sup>3+</sup> doped HST samples

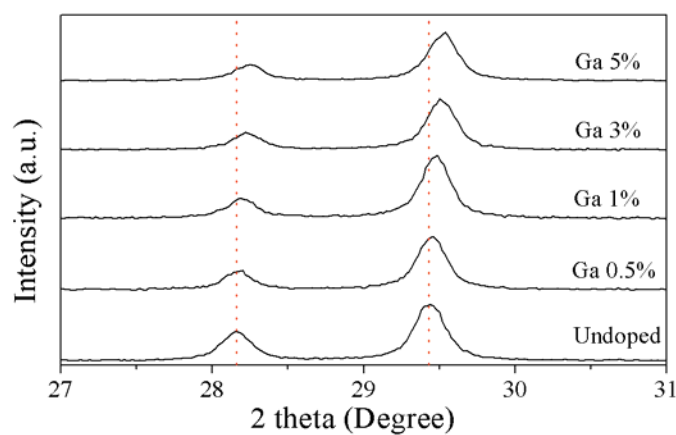

**Fig. S3** UV-vis DRS of Ga/HST at different doping levels

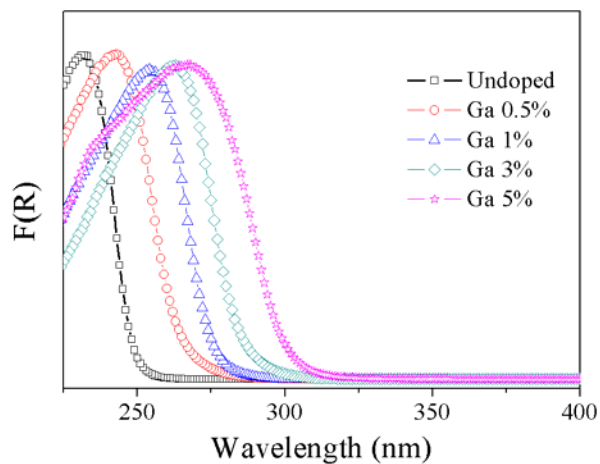

Supplement: c1cp22894c.pdf [file c1cp22894c.pdf]
